# Supplementary material for: Gold–glutathione complex catalysts with carbon support for non-mercury catalytic acetylene hydrochlorination
Source: Royal Society of Chemistry journal article supplement (doi:10.1039/c6ra23455k), 2016-01-01
Supplement: c6ra23455k1.pdf [file c6ra23455k1.pdf]

1  
2  
3  
4  
5  
6  
7  
8  
9  
10  
11  
12  
13  
14  
15  
16  
17  
18  
19  
20  
21  
22

Supporting Information

**Gold-glutathione complex catalyst with carbon support for non-mercury catalytic acetylene hydrochlorination**

Xueyan Qi <sup>a</sup>, Wei Li <sup>a</sup>, Junjie Gu <sup>a</sup>, Cuili Guo <sup>a</sup> and Jinli Zhang <sup>\*a,b</sup>

<sup>a</sup> School of Chemical Engineering & Technology, Tianjin University, Tianjin 300350, People's Republic of China.

<sup>b</sup> School of Chemistry & Chemical Engineering, Shihezi University, Xinjiang, Shihezi 832000, People's Republic of China.

\* To whom correspondence may be addressed.

Fax: +86-22-2740-3389; Tel: +86-22-2789-0643.

*E-mail address:* zhangjinli@tju.edu.cn (J.L. Zhang)

1 **Table of contents:**

2 **Table S1.** The desorption areas and desorption temperature of C<sub>2</sub>H<sub>2</sub> for the fresh

3 Au/AC and Au1-GSH3/AC catalysts.

4 **Fig. S1.** Selectivity to VCM over the different molar ratios of Au/GSH for Au-

5 GSH/AC (pH 8.3) catalysts. Reaction conditions: temperature (T) = 170 °C, GHSV

6 (C<sub>2</sub>H<sub>2</sub>) = 360 h<sup>-1</sup>, and feed volume ratio V<sub>HCl</sub>/V<sub>C<sub>2</sub>H<sub>2</sub></sub> = 1.1.

7 **Fig. S2.** Selectivity to VCM over the different pH values for Au1-GSH3/AC catalysts.

8 Reaction conditions: temperature (T) = 170 °C, GHSV (C<sub>2</sub>H<sub>2</sub>) = 360 h<sup>-1</sup>, and feed

9 volume ratio V<sub>HCl</sub>/V<sub>C<sub>2</sub>H<sub>2</sub></sub> = 1.1.

10 **Fig. S3.** TG and DTG curves of the fresh and used (a) AC, (b) GSH/AC, (c) Au1-

11 GSH3/AC (pH 2), (d) Au1-GSH3/AC (pH 4.5) and (e) Au1-GSH3/AC (pH 12)

12 catalysts.

13 **Fig. S4** XRD patterns of the AC, HF-AC and HCl-AC samples.

14 **Fig. S5.** TEM images and the particle size distribution of the fresh and used catalysts.

15 **Fig. S6.** High-resolution XPS spectra of Au 4f for fresh and used Au/AC and Au1-

16 GSH3/AC catalysts.

17

18

19

20

21

22

1 **Table S1** The desorption areas and desorption temperature of C<sub>2</sub>H<sub>2</sub> for the fresh Au/AC and Au1-  
 2 GSH3/AC catalysts

| catalyst             | desorption area | desorption temperature (°C) |
|----------------------|-----------------|-----------------------------|
| Au/AC                | 762.3           | 236                         |
| Au1-GSH3/AC (pH 2)   | 1142.4          | 327                         |
| Au1-GSH3/AC (pH 4.5) | 1210.3          | 329                         |
| Au1-GSH3/AC (pH 8.3) | 1372.5          | 337                         |
| Au1-GSH3/AC (pH 12)  | 1573.3          | 322                         |

3

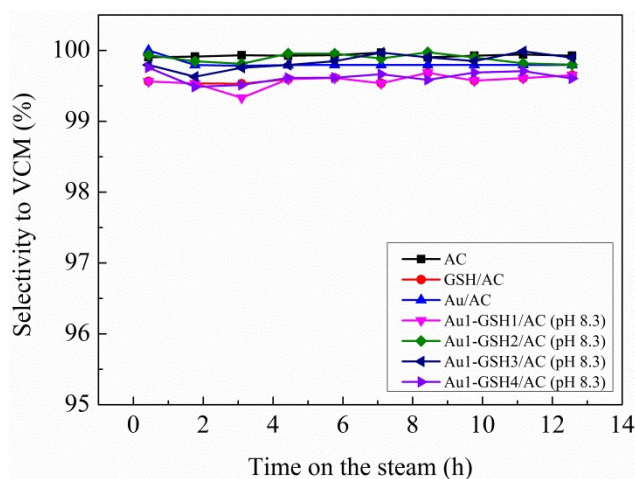

4

5 **Fig. S1** Selectivity to VCM over the different molar ratios of Au/GSH for the Au-GSH/AC (pH  
 6 8.3) catalysts. Reaction conditions: temperature (T) = 170 °C, GHSV (C<sub>2</sub>H<sub>2</sub>) = 360 h<sup>-1</sup>, and feed  
 7 volume ratio V<sub>HCl</sub>/V<sub>C<sub>2</sub>H<sub>2</sub></sub> = 1.1.

8

9

10

11

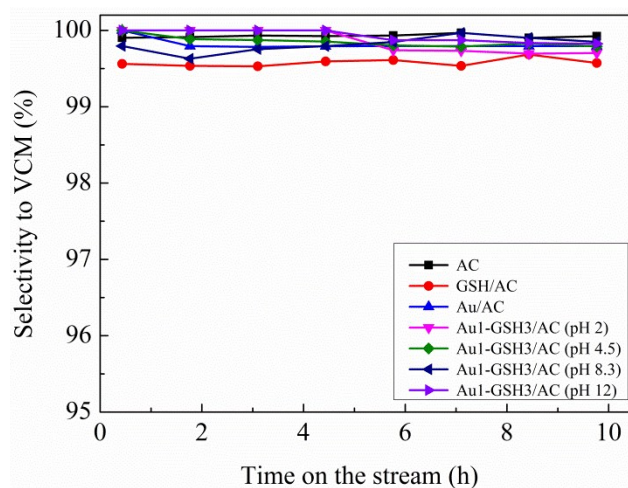

1

2 **Fig. S2** Selectivity to VCM over the different pH values of Au1-GSH3/AC catalysts. Reaction

3 conditions: temperature (T) = 170 °C, GHSV (C<sub>2</sub>H<sub>2</sub>) = 360 h<sup>-1</sup>, and feed volume ratio V<sub>HCl</sub>/V<sub>C<sub>2</sub>H<sub>2</sub></sub>

4 = 1.1.

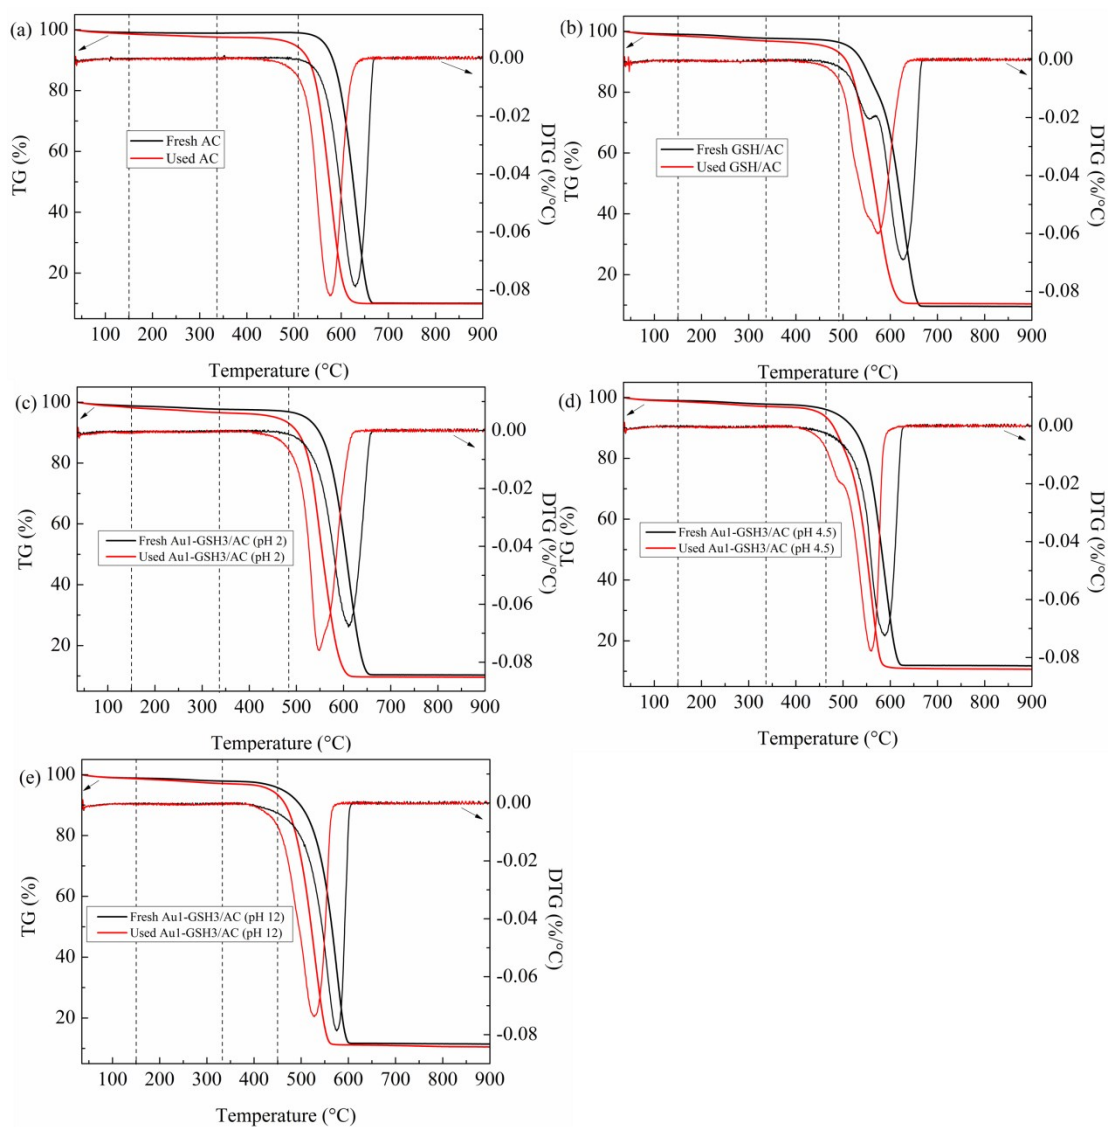

1

2 **Fig. S3** TG and DTG curves of the fresh and used (a) AC, (b) GSH/AC, (c) Au1-GSH3/AC (pH

3

2), (d) Au1-GSH3/AC (pH 4.5) and (e) Au1-GSH3/AC (pH 12) catalysts.

4

5 We have treated the coal-based activated carbon in two ways, the methods are

6 shown below.

7 (1) Hydrochloric acid treated

8 The activated carbon (20 g) was initially washed with 100 ml HCl (1 mol L<sup>-1</sup>)

9 aqueous solution at 70 °C for 5 h to remove possible impurities of Na, Fe and Cu,

1 then the carbon was filtered and washed with distilled water until the pH value equals  
2 to pH 7 and dried at 150 °C for 12 h [1]. The final sample was denoted as HCl-AC.

3 (2) Hydrofluoric acid treated:

4 The activated carbon (20 g) was pretreated with the mixture solution of 75 ml HF  
5 (29 mol L<sup>-1</sup>) and 25 ml HCl (12 mol L<sup>-1</sup>) at 60 °C for 12 h, then the carbon was  
6 filtered and washed by the distilled water until the pH value equals to pH 7 followed  
7 by vacuum drying at 105 °C for 12 h [2]. The obtained sample was denoted as HF-AC.

8

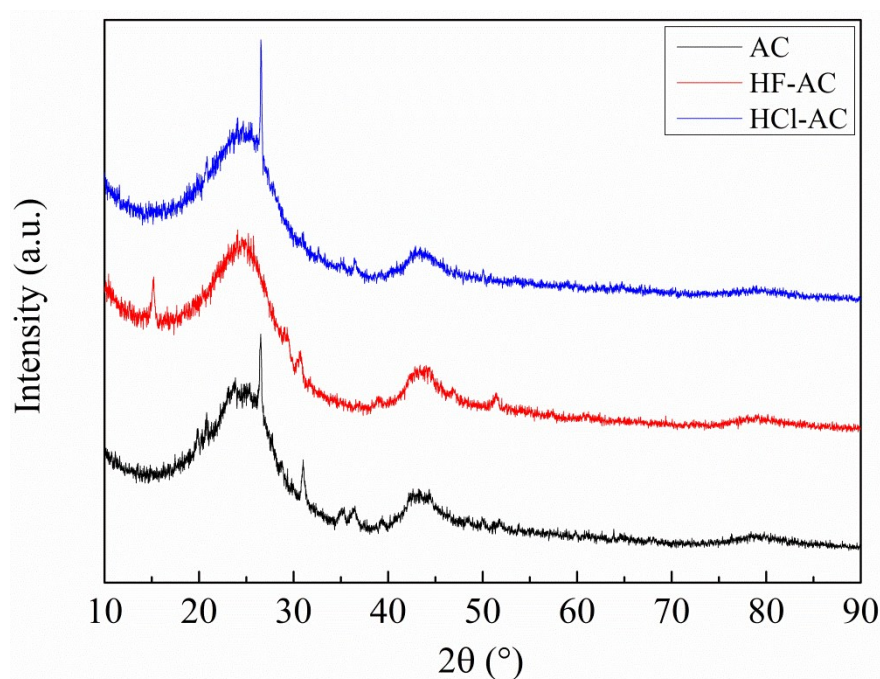

9

10 **Fig. S4** XRD patterns of the AC, HF-AC and HCl-AC samples.

11 [1] H. Y. Zhang, B. Dai, X. G. Wang, W. Li, Y. Han, J. J. Gu and J. L. Zhang, *Green Chem.*, 2013,  
12 **15**, 829.

13 [2] C. W. Dale, C. G. Macpherson, D. G. Pearson, S. J. Hammond and R. J. Arculus, *Geochimica*  
14 *et Cosmochimica Acta.*, 2012, **89**, 202.

15

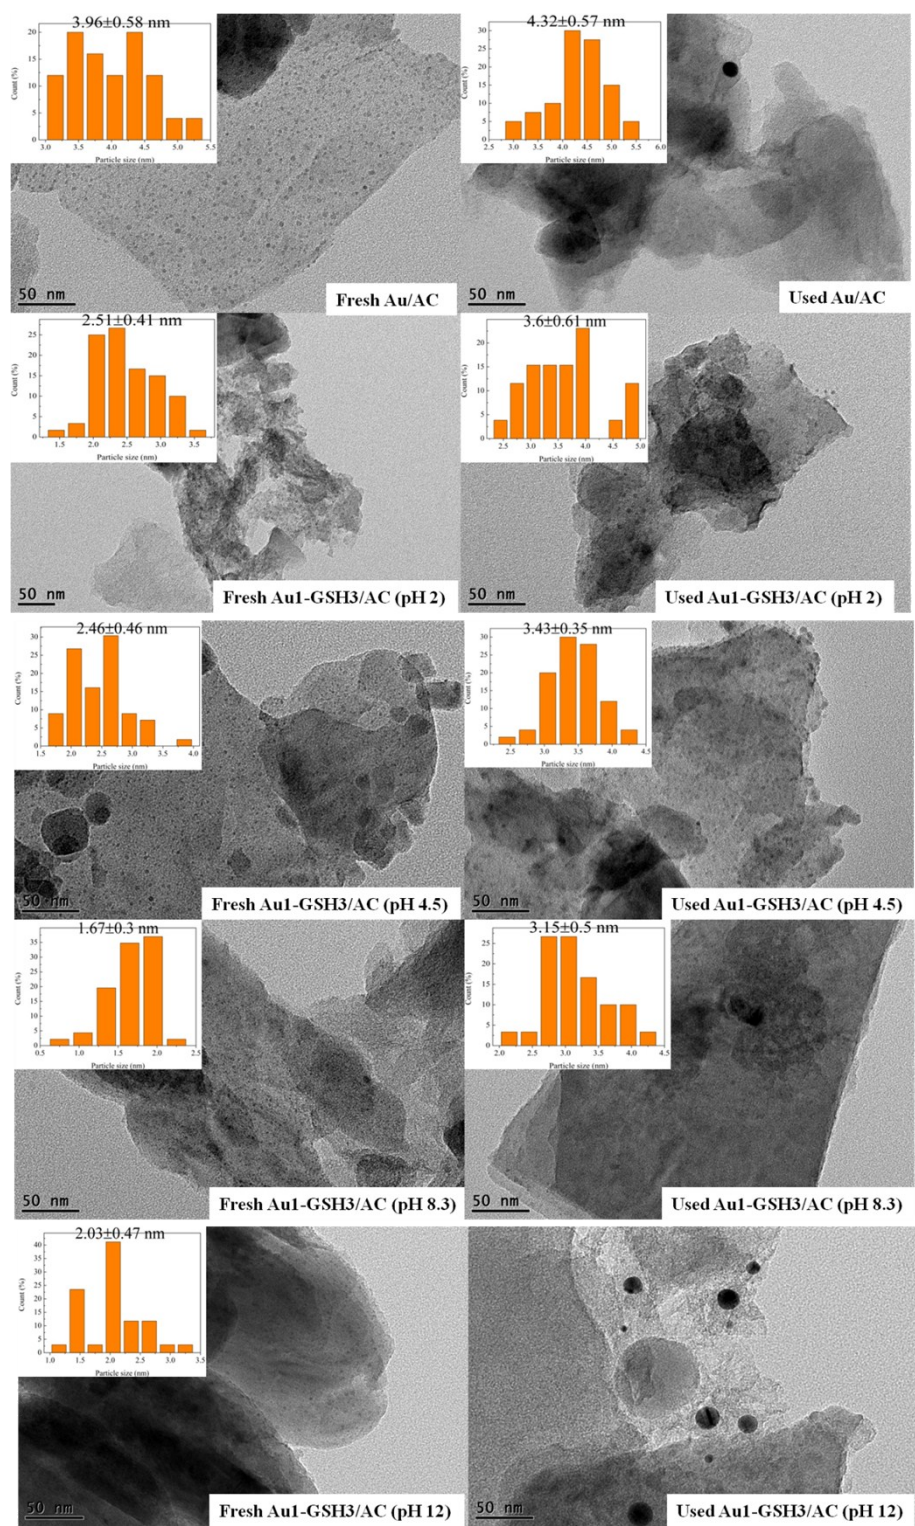

1

2 **Fig. S5** TEM images and the particle size distribution of the fresh and used catalysts.

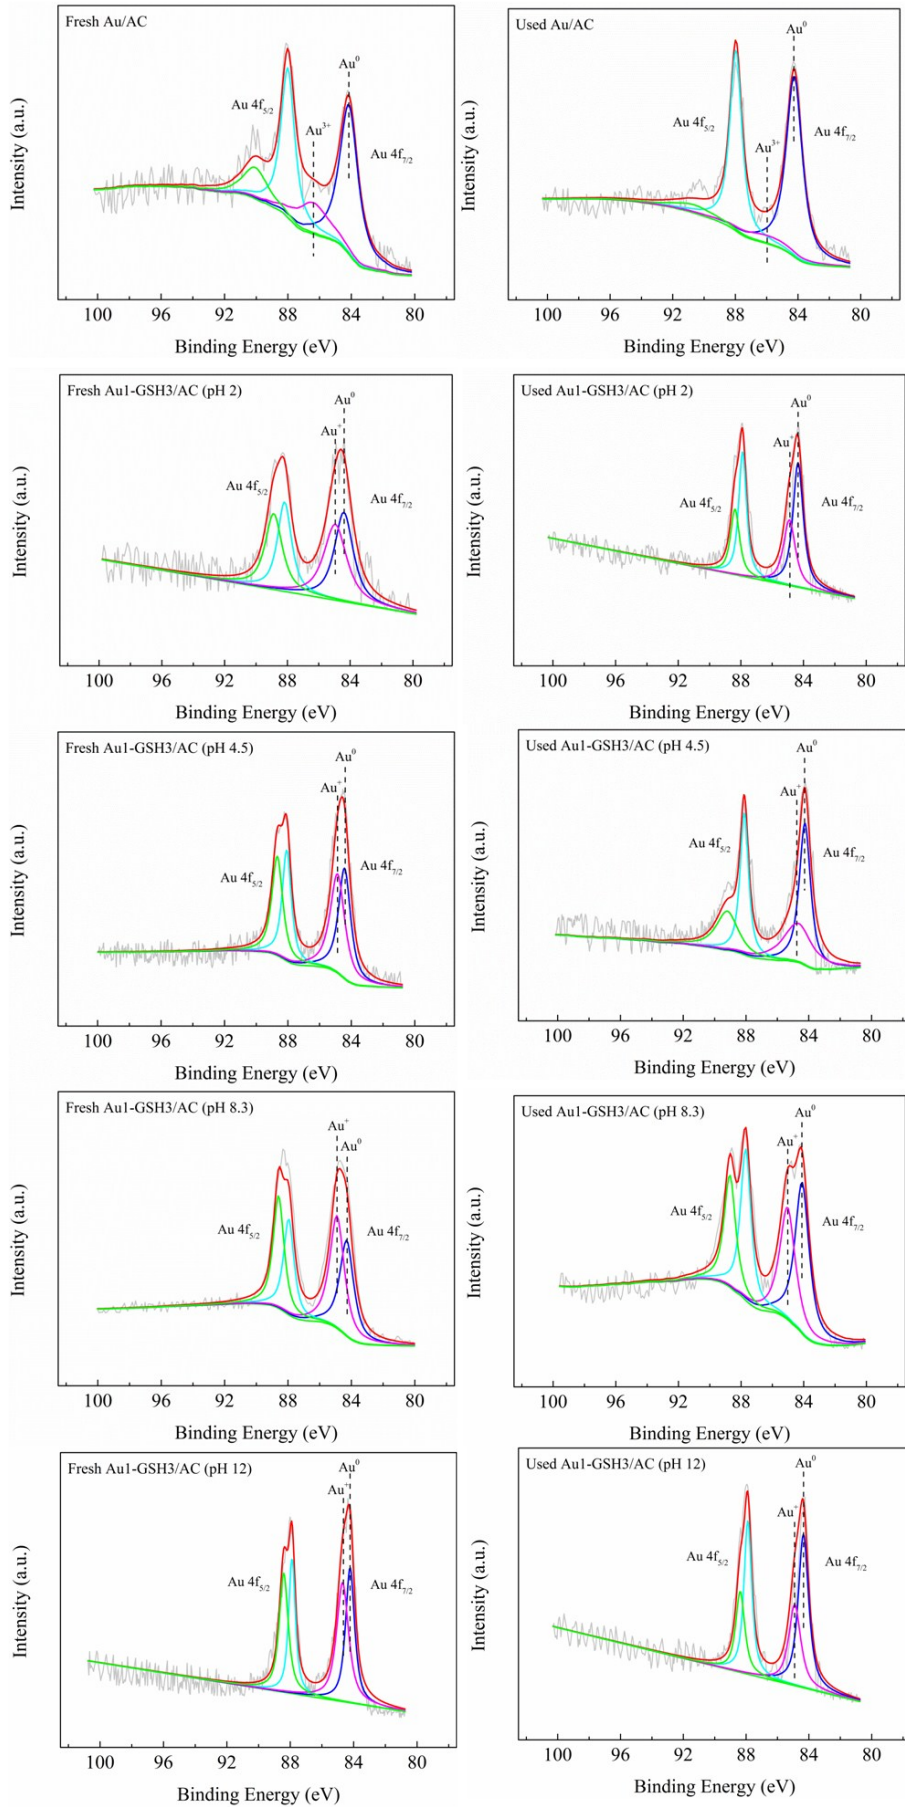



1 **Fig. S6** High-resolution XPS spectra of Au 4f for fresh and used Au/AC and Au1-GSH3/AC

2 catalysts.
